# Supplementary material for: Association of Healthy Eating Index-2015 and Dietary Approaches to Stop Hypertension Patterns with Insulin Resistance in Schoolchildren
Source: MDPI journal article supplement (doi:10.3390/nu14204232), 2022-10-11
Supplement: s1 [file s1]

**Table S6.** Diet quality in the schoolchildren studied according to HOMA-IR and age

|                                             | 8-10 years              |                        |              | 11-13 years             |                        |              |
|---------------------------------------------|-------------------------|------------------------|--------------|-------------------------|------------------------|--------------|
|                                             | HOMA-IR≤3.16<br>(n=410) | HOMA-IR>3.16<br>(n=31) | P            | HOMA-IR≤3.16<br>(n=399) | HOMA-IR>3.16<br>(n=14) | P            |
| Energy intake (kcal) #                      | 2082±359                | 2161±479               | 0.205        | <b>2191±386</b>         | <b>2219±427</b>        | <b>0.024</b> |
| Energy expenditure (kcal)                   | 2105±347                | 2038±357               | 0.627        | 2120±356                | 1976±314               | 0.996        |
| EI/EE (%)                                   | 103.8±23.3              | 98.7±28.6              | 0.329        | <b>99.2±21.7</b>        | <b>91.0±17.0 #</b>     | <b>0.030</b> |
| Proteins (%) -R                             | <b>15.4±2.3</b>         | <b>16.5±1.7</b>        | <b>0.017</b> | 15.8±2.4                | 15.2±2.6               | 0.203        |
| Carbohydrates (%)                           | 41.1±5.1                | 40.1±5.3               | 0.429        | 40.9±5.0                | 40.5±4.9#              | 0.350        |
| Lipids (%)                                  | 41.9±4.7                | 41.7±5.6#              | 0.433        | 41.7±4.8                | 42.5±4.9#              | 0.232        |
| <b>HEI-2015 (total score) #</b>             | 59.6±8.3                | 59.2±8.6               | 0.427        | 58.7±8.9                | 56.3±8.6               | 0.097        |
| Total Fruits (score)                        | 3.7±1.4                 | 3.5±1.7                | 0.701        | 3.6±1.5                 | 3.7±1.5                | 0.830        |
| Whole Fruits (score)                        | 4.0±1.5                 | 3.4±1.9                | 0.342        | 3.8±1.7                 | 4.1±1.4                | 0.251        |
| Total Vegetables (score)                    | 3.1±1.4                 | 3.0±1.4                | 0.660        | 3.1±1.3                 | 2.8±1.6                | 0.421        |
| Greens and Beans (score)                    | 3.8±1.7                 | 4.0±1.4                | 0.983        | 3.8±1.7                 | 3.2±2.1                | 0.079        |
| Whole Grains (score)                        | 1.1±1.7                 | 0.8±1.0                | 0.890        | 1.1±1.9                 | 0.4±0.6                | 0.211        |
| Dairy (score)                               | 7.1±2.1                 | 7.7±1.7                | 0.277        | 6.8±2.1                 | 6.9±2.0                | 0.978        |
| Total Protein Foods (score)-R               | 4.9±0.4                 | 5.0±0.0                | 0.054        | 4.9±0.3                 | 4.8±0.4                | 0.063        |
| Seafood and Plant Proteins (score)          | 1.9±1.4                 | 2.3±1.6                | 0.233        | 2.0±1.4                 | 1.9±1.4                | 0.743        |
| (PUFAs+MUFAs)/SFAs (score)                  | 3.2±2.2                 | 2.6±2.1                | 0.217        | 3.2±2.3                 | 3.0±2.5                | 0.636        |
| Refined Grains (score)                      | 7.0±2.4                 | 6.5±2.8                | 0.533        | 6.7±2.4                 | 6.9±2.2                | 0.843        |
| Sodium (score) -A                           | 8.7±1.8                 | 9.1±1.3                | 0.558        | 8.4±2.2                 | 7.9±2.5                | 0.462        |
| Added Sugars (score) -R                     | 8.6±1.6                 | 9.2±1.1                | 0.150        | 8.8±1.5                 | 8.4±1.8                | 0.472        |
| Saturated Fats (score)                      | 2.3±2.1                 | 2.1±1.8                | 0.664        | 2.5±2.2                 | 2.2±1.9                | 0.721        |
| Total Fruits (cups/1000kcal)                | 0.71±0.39               | 0.76±0.54              | 0.984        | 0.71±0.41               | 0.68±0.34              | 0.938        |
| Whole Fruits (cups/1000kcal)                | 0.48±0.32               | 0.52±0.48              | 0.801        | 0.46±0.33               | 0.51±0.28              | 0.210        |
| Total Vegetables (cups/1000kcal)            | 0.75±0.46               | 0.79±0.61              | 0.724        | 0.74±0.44               | 0.69±0.49              | 0.438        |
| Greens and Beans (cups/1000kcal)            | 0.34±0.35               | 0.44±0.53              | 0.605        | 0.33±0.34               | 0.29±0.33              | 0.212        |
| Whole Grains (oz /1000kcal)                 | 0.17±0.27               | 0.12±0.15              | 0.889        | 0.17±0.29               | 0.06±0.10              | 0.211        |
| Dairy (cups/1000kcal)                       | 0.95±0.31               | 1.01±0.22 #            | 0.227        | 0.90±0.32               | 0.92±0.33              | 0.955        |
| Total Protein Foods (oz /1000kcal) -R       | <b>3.5±1.0</b>          | <b>4.0±1.0 #</b>       | <b>0.028</b> | 3.7±1.1                 | 3.5±1.2                | 0.204        |
| Seafood and Plant Proteins (cups /1000kcal) | 0.69±0.54               | 0.91±0.74              | 0.228        | 0.74±0.61               | 0.68±0.51              | 0.744        |
| (PUFAs+MUFAs)/SFAs                          | 1.6±0.3                 | 1.5±0.3                | 0.232        | 1.6±0.3                 | 1.6±0.3 #              | 0.380        |
| Refined Grains (oz/1000kcal)                | 2.5±0.7                 | 2.6±0.7 #              | 0.214        | 2.6±0.7                 | 2.6±0.6 #              | 0.427        |
| Sodium (mg/1000kcal)                        | 1152±222                | 1132±165               | 0.781        | 1198±263                | 1217±305               | 0.766        |
| Added Sugars (% of kcal)                    | 8.7±3.6                 | 7.6±2.6                | 0.190        | 8.2±3.5                 | 8.8±4.3                | 0.494        |
| Saturated Fats (% of kcal)                  | 14.4±2.1                | 14.7±1.9 #             | 0.289        | 14.3±2.2                | 14.8±2.5 #             | 0.157        |
| <b>DASH (total score)</b>                   | 23.5±3.7                | 23.8±3.1               | 0.760        | 22.9±3.8                | 23.5±4.0               | 0.510        |
| Red meat (score)                            | 3.0±1.4                 | 3.0±1.5                | 0.934        | 2.8±1.4                 | 3.3±1.5                | 0.108        |
| Sugar drinks (score)                        | 1.8±0.4                 | 1.8±0.4                | 0.774        | 1.8±0.4                 | 1.7±0.5                | 0.200        |
| Sodium (score)                              | 2.9±1.5                 | 3.3±1.6                | 0.168        | 2.7±1.4                 | 3.1±1.6                | 0.218        |
| Whole Grains (score) -I                     | 3.6±0.8                 | 3.4±0.7                | 0.312        | 3.6±0.8                 | 3.3±0.5                | 0.074        |
| Low-fat dairy (score)                       | 3.2±1.2                 | 3.3±1.3                | 0.770        | <b>3.2±1.2</b>          | <b>3.8±1.0</b>         | <b>0.013</b> |
| Vegetables (score)                          | 3.0±1.4                 | 2.7±1.4                | 0.449        | 3.0±1.4                 | 2.9±1.7                | 0.651        |
| Seeds, nuts and legumes (score)             | 3.0±1.4                 | 3.2±1.3                | 0.545        | 2.9±1.5                 | 3.0±1.6                | 0.777        |
| Fruits (score)                              | 3.0±1.4                 | 2.9±1.4                | 0.843        | 3.1±1.5                 | 2.6±1.3                | 0.141        |
| Red meat (g)                                | 101.2±46.5              | 106.3±54.5#            | 0.322        | 111.9±54.1              | 97.0±51.4#             | 0.089        |
| Sugar drinks (g)                            | 49.9±89.6               | 35.3±74.0              | 0.532        | 54.6±99.0               | 72.1±108.6             | 0.314        |
| Sodium (mg)                                 | 2.416±574               | 2.306±523              | 0.423        | 2.531±669               | 2.385±651              | 0.251        |
| Whole Grains (g)                            | 10.1±16.0               | 6.8±8.2                | 0.836        | 10.2±17.9               | 3.6±5.8                | 0.186        |
| Low-fat dairy (g)                           | 97.1±130.1              | 119.8±152.8            | 0.977        | <b>96.7±128.3</b>       | <b>124.4±91.8</b>      | <b>0.017</b> |
| Vegetables (g)                              | 124.7±61.5              | 115.4±62.4             | 0.462        | 125.9±56.0              | 121.1±65.4             | 0.611        |
| Seeds, nuts and legumes (g)                 | 28.8±29.6               | 27.8±21.0              | 0.587        | 26.8±30.4               | 30.4±33.1              | 0.904        |
| Fruits (g)                                  | 269.8±157.1             | 261.4±178.5            | 0.727        | 274.8±168.8             | 230.0±140.0            | 0.196        |

|                                      | 8-10 years              |                        |       | 11-13 years             |                        |              |
|--------------------------------------|-------------------------|------------------------|-------|-------------------------|------------------------|--------------|
|                                      | HOMA-IR≤3.16<br>(n=410) | HOMA-IR>3.16<br>(n=31) | p     | HOMA-IR≤3.16<br>(n=399) | HOMA-IR>3.16<br>(n=14) | p            |
| <b>aDASH (total score)</b>           | 23.5±3.9                | 23.4±3.9               | 0.806 | 22.9±4.0                | 23.5±3.8               | 0.633        |
| Red meat (score)                     | 3.0±1.4                 | 2.9±1.5                | 0.813 | 2.8±1.4                 | 3.2±1.4                | 0.161        |
| Sugar drinks (score) -A              | 1.8±0.4                 | 1.9±0.3                | 0.382 | 1.8±0.4                 | 1.7±0.5                | 0.118        |
| Sodium (score)                       | 2.9±1.5                 | 3.0±1.4                | 0.791 | 2.7±1.5                 | 2.7±1.7                | 0.994        |
| Whole Grains (score)                 | 3.6±0.8                 | 3.4±0.7                | 0.365 | 3.6±0.8                 | 3.3±0.5                | 0.132        |
| Low-fat dairy (score)                | 3.2±1.2                 | 3.3±1.3                | 0.713 | <b>3.2±1.2</b>          | <b>3.8±1.0</b>         | <b>0.015</b> |
| Vegetables (score)                   | 3.0±1.4                 | 2.6±1.3                | 0.292 | 3.0±1.4                 | 3.1±1.7                | 0.791        |
| Seeds, nuts and legumes (score)      | 3.0±1.4                 | 3.3±1.3                | 0.451 | 2.9±1.5                 | 3.0±1.6                | 0.686        |
| Fruits (score)                       | 3.0±1.4                 | 2.9±1.5                | 0.870 | 3.0±1.5                 | 2.8±1.3                | 0.363        |
| Red meat (g/1000kcal)                | 48.4±21.9               | 52.1±25.5              | 0.663 | 53.2±24.6               | 50.1±28.5              | 0.271        |
| Sugar drinks (g/1000kcal)            | 23.7±44.0               | 15.6±32.7              | 0.512 | 25.9±47.6               | 35.2±51.5              | 0.325        |
| Sodium (mg/1000kcal)                 | 1152±222                | 1132±165               | 0.781 | 1198±263                | 1217±305               | 0.766        |
| Whole Grains (g/1000kcal)            | 4.8±7.5                 | 3.3±4.3                | 0.848 | 4.8±8.2                 | 1.8±2.7                | 0.201        |
| Low-fat dairy (g/1000kcal)           | 47.5±64.5               | 54.3±67.3              | 0.989 | 45.9±61.1               | 63.4±48.3              | 0.100        |
| Vegetables (g/1000kcal)              | 59.4±27.9               | 54.3±23.6              | 0.500 | 60.2±27.1               | 63.7±37.8              | 0.926        |
| Seeds, nuts and legumes (g/1000kcal) | 13.7±14.1               | 13.5±9.0               | 0.445 | 12.6±14.1               | 15.6±16.9              | 0.722        |
| Fruits (g/1000kcal)                  | 128.8±73.1              | 127.8±88.7             | 0.779 | 130.8±79.6              | 116.5±64.7             | 0.473        |

HEI-2015. Healthy eating index; DASH. Dietary Approaches to Stop Hypertension; aDASH. Alternate Dietary Approaches to Stop Hypertension MUFAs, monounsaturated fatty acids; PUFAs, polyunsaturated fatty acids; SFAs, saturated fatty acids. Two-way ANOVA analysis: A: differences according to age; I: differences according to insulin resistance (IR) score; R: interaction between sex and IR. # Variable follow a normal distribution. For comparison of means, the Mann-Whitney U test was used if the distribution of the variables was not homogeneous, the Student's t-test for homogeneous distributions.
