# Supplementary material for: Association of Healthy Eating Index-2015 and Dietary Approaches to Stop Hypertension Patterns with Insulin Resistance in Schoolchildren
Source: MDPI journal article supplement (doi:10.3390/nu14204232), 2022-10-11
Supplement: s1 [file s1]

Table S4. Diet quality in the schoolchildren studied according to sex and age.

|                                               | Total             |                   |                  | Girls             |                   |                  | Boys             |                   |              |
|-----------------------------------------------|-------------------|-------------------|------------------|-------------------|-------------------|------------------|------------------|-------------------|--------------|
|                                               | 8-10 years        | 11-13 years       | P                | 8-10 years        | 11-13 years       | P                | 8-10 years       | 11-13 years       | P            |
| Energy intake (EI) (kcal) -S                  | 2103±347          | 2108±355#         | 0.421            | 2068±350          | 2063±318          | 0.939            | 2138±341         | 2160±388#         | 0.276        |
| Energy expenditure (EE) (kcal) -SA            | <b>2085±364</b>   | <b>2193±389</b>   | <b>&lt;0.001</b> | <b>1845±241</b>   | <b>1986±280</b>   | <b>&lt;0.001</b> | <b>2328±301</b>  | <b>2436±358</b>   | <b>0.004</b> |
| EE/EI (%) -SA                                 | <b>103.6±23.5</b> | <b>98.5±21.4#</b> | <b>&lt;0.001</b> | <b>113.9±23.6</b> | <b>105.6±20.4</b> | <b>&lt;0.001</b> | 93.2±18.1        | 90.2±19.6#        | 0.061        |
| Proteins (%)                                  | 15.5±2.3          | 15.8±2.4          | 0.120            | 15.5±2.2          | 15.8±2.5          | 0.531            | 15.4±2.4         | 15.7±2.3          | 0.128        |
| Carbohydrates (%)                             | 41.0±5.1          | 40.9±5.0          | 0.796            | 40.9±5.2          | 40.8±4.6          | 0.834            | 41.2±5.1         | 41.0±5.5          | 0.351        |
| Lipids (%) #                                  | 41.9±4.7          | 41.8±4.8          | 0.417            | 41.9±4.7          | 41.8±4.6          | 0.413            | 41.8±4.8         | 41.8±5.1          | 0.467        |
| <b>HEI-2015 (total score) # -S</b>            | <b>59.5±8.3</b>   | <b>58.5±8.9</b>   | <b>0.039</b>     | <b>61.0±8.1</b>   | <b>59.3±8.9</b>   | <b>0.024</b>     | 58.1±8.2         | 57.5±8.8          | 0.235        |
| Total Fruits (score) -S                       | 3.7±1.4           | 3.7±1.5           | 0.821            | 3.9±1.4           | 3.7±1.5           | 0.711            | 3.6±1.4          | 3.5±1.6           | 0.940        |
| Whole Fruits (score) -S                       | 4.0±1.5           | 3.8±1.6           | 0.404            | 4.1±1.5           | 4.0±1.5           | 0.569            | 3.9±1.5          | 3.7±1.8           | 0.436        |
| Total Vegetables (score) -S                   | 3.1±1.4           | 3.1±1.3           | 0.774            | 3.3±1.4           | 3.1±1.3           | 0.182            | 2.9±1.4          | 3.0±1.3           | 0.353        |
| Greens and Beans (score) -S                   | 3.8±1.7           | 3.8±1.7           | 0.661            | 3.9±1.6           | 3.9±1.6           | 0.604            | 3.7±1.7          | 3.6±1.8           | 0.824        |
| Whole Grains (score)                          | 1.1±1.7           | 1.1±1.8           | 0.383            | 1.1±1.8           | 1.0±1.7           | 0.391            | 1.1±1.7          | 1.2±2.0           | 0.745        |
| Dairy (score) -A                              | <b>7.1±2.1</b>    | <b>6.8±2.1</b>    | <b>0.011</b>     | 7.0±2.1           | 6.7±2.1           | 0.123            | <b>7.2±2.0</b>   | <b>6.8±2.1</b>    | <b>0.045</b> |
| Total Protein Foods (score)                   | 4.9±0.4           | 4.9±0.3           | 0.085            | 4.9±0.4           | 4.9±0.3           | 0.404            | 4.9±0.4          | 4.9±0.3           | 0.117        |
| Seafood and Plant Proteins (score)            | 1.9±1.4           | 1.9±1.4           | 0.629            | 2.0±1.4           | 2.0±1.4           | 0.881            | 1.8±1.3          | 1.9±1.4           | 0.411        |
| (PUFAs+MUFAs)/SFAs (score) -S                 | 3.2±2.2           | 3.2±2.3           | 0.964            | 3.5±2.3           | 3.4±2.4           | 0.502            | 2.9±2.0          | 3.0±2.1           | 0.620        |
| Refined Grains (score)                        | 7.0±2.4           | 6.7±2.4           | 0.068            | <b>7.1±2.4</b>    | <b>6.7±2.4</b>    | <b>0.037</b>     | 6.8±2.4          | 6.7±2.4           | 0.598        |
| Sodium (score) -SA                            | <b>8.7±1.8</b>    | <b>8.3±2.2</b>    | <b>0.038</b>     | 8.9±1.6           | 8.5±2.0           | 0.111            | 8.6±1.9          | 8.1±2.4           | 0.135        |
| Added Sugars (score)                          | 8.6±1.6           | 8.8±1.5           | 0.164            | 8.7±1.6           | 8.8±1.5           | 0.412            | 8.6±1.6          | 8.7±1.6           | 0.294        |
| Saturated Fats (score) -S                     | 2.3±2.1           | 2.4±2.2           | 0.657            | 2.5±2.1           | 2.5±2.3           | 0.827            | 2.1±2.1          | 2.3±2.1           | 0.412        |
| Total Fruits (cups/1000kcal)                  | <b>0.71±0.40</b>  | <b>0.71±0.41</b>  | <b>0.029</b>     | 0.74±0.39         | 0.73±0.40         | 0.701            | 0.68±0.40        | 0.69±0.42         | 0.881        |
| Whole Fruits (cups/1000kcal)                  | <b>0.48±0.32</b>  | <b>0.46±0.32</b>  | <b>0.070</b>     | 0.49±0.32         | 0.48±0.32         | 0.656            | 0.47±0.32        | 0.44±0.32         | 0.471        |
| Total Vegetables (cups/1000kcal) -S           | <b>0.75±0.46</b>  | <b>0.74±0.44</b>  | <b>0.000</b>     | 0.82±0.51         | 0.76±0.47         | 0.172            | 0.67±0.39        | 0.71±0.41         | 0.339        |
| Greens and Beans (cups/1000kcal)              | <b>0.34±0.36</b>  | <b>0.33±0.34</b>  | <b>0.075</b>     | 0.38±0.41         | 0.33±0.35         | 0.424            | 0.30±0.30        | 0.32±0.33         | 0.875        |
| Whole Grains (oz/1000kcal)                    | 0.17±0.26         | 0.16±0.28         | 0.308            | 0.17±0.27         | 0.14±0.26         | 0.393            | 0.17±0.26        | 0.18±0.31         | 0.747        |
| Dairy (cups/1000kcal) -A                      | 0.95±0.31         | 0.90±0.32         | 0.248            | 0.94±0.32         | 0.90±0.32         | 0.135            | <b>0.96±0.30</b> | <b>0.91±0.32#</b> | <b>0.043</b> |
| Total Protein Foods (oz/1000kcal)             | 3.5±1.0           | 3.7±1.1           | 0.883            | 3.6±1.1           | 3.6±1.1           | 0.672            | <b>3.5±1.0</b>   | <b>3.8±1.1#</b>   | <b>0.003</b> |
| Seafood and Plant Proteins (cups/1000kcal) -A | 0.70±0.54         | 0.73±0.61         | 0.176            | 0.74±0.57         | 0.74±0.61         | 0.878            | 0.66±0.52        | 0.73±0.61         | 0.410        |
| (PUFAs+MUFAs)/SFAs                            | <b>1.61±0.30</b>  | <b>1.60±0.31</b>  | <b>0.000</b>     | 1.65±0.31         | 1.63±0.33 #       | 0.229            | 1.57±0.28        | 1.58±0.28#        | 0.394        |
| Refined Grains (oz/1000kcal)# -S              | 2.5±0.7           | 2.6±0.7           | 0.100            | <b>2.5±0.7</b>    | <b>2.6±0.7</b>    | <b>0.025</b>     | 2.6±0.6          | 2.6±0.7           | 0.360        |
| Sodium (mg/1000kcal) -SA                      | 1152±220          | 1200±266          | 0.063            | 1137±200          | 1178±248          | 0.141            | 1166±239         | 1225±286          | 0.082        |
| Added Sugars (% of kcal)                      | 8.7±3.6           | 8.3±3.6           | 0.096            | 8.5±3.7           | 8.1±3.5           | 0.442            | 8.9±3.5          | 8.4±3.7           | 0.123        |
| Saturated Fats (% of kcal) #                  | <b>14.4±2.1</b>   | <b>14.4±2.2</b>   | <b>0.009</b>     | 14.2±2.0          | 14.3±2.2          | 0.332            | 14.6±2.1         | 14.5±2.2          | 0.226        |
| <b>DASH (total score)</b>                     | <b>23.6±3.7</b>   | <b>23.0±3.8</b>   | <b>0.048</b>     | 24.2±3.6          | 23.4±3.7          | 0.019            | 22.9±3.6         | 22.5±3.9          | 0.468        |
| Red meat (score)                              | <b>3.0±1.4</b>    | <b>2.8±1.4</b>    | <b>0.041</b>     | 3.1±1.4           | 3.1±1.4           | 0.922            | <b>2.9±1.4</b>   | <b>2.5±1.4</b>    | <b>0.002</b> |
| Sugar drinks (score)                          | <b>1.82±0.39</b>  | <b>1.76±0.43</b>  | <b>0.037</b>     | <b>1.86±0.35</b>  | <b>1.79±0.41</b>  | <b>0.045</b>     | 1.77±0.42        | 1.72±0.45         | 0.251        |
| Sodium (score)                                | 2.9±1.5           | 2.7±1.5           | 0.073            | 3.1±1.4           | 2.9±1.4           | 0.264            | 2.7±1.5          | 2.5±1.5           | 0.082        |
| Whole Grains (score)                          | 3.6±0.8           | 3.5±0.8           | 0.237            | 3.6±0.8           | 3.5±0.7           | 0.119            | 3.6±0.8          | 3.6±0.8           | 0.973        |
| Low-fat dairy (score)                         | 3.2±1.2           | 3.2±1.2           | 0.656            | 3.2±1.2           | 3.2±1.2           | 0.681            | 3.2±1.2          | 3.3±1.2           | 0.279        |
| Vegetables (score)                            | 3.0±1.4           | 3.0±1.4           | 0.853            | 3.1±1.4           | 3.0±1.5           | 0.641            | 2.9±1.4          | 3.0±1.3           | 0.461        |

|                                      | Total             |                   |                  | Girls            |                  |              | Boys              |                   |              |
|--------------------------------------|-------------------|-------------------|------------------|------------------|------------------|--------------|-------------------|-------------------|--------------|
|                                      | 8-10 years        | 11-13 years       | P                | 8-10 years       | 11-13 years      | P            | 8-10 years        | 11-13 years       | P            |
| Seeds, nuts and legumes (score)      | 3.0±1.4           | 2.9±1.5           | 0.146            | <b>3.2±1.4</b>   | <b>2.8±1.4</b>   | <b>0.020</b> | 2.9±1.4           | 2.9±1.6           | 0.861        |
| Fruits (score)                       | 3.0±1.4           | 3.0±1.4           | 0.902            | 3.1±1.4          | 3.0±1.4          | 0.703        | 2.9±1.4           | 3.0±1.4           | 0.581        |
| Red meat (g) -SA                     | <b>101.4±46.8</b> | <b>110.6±53.9</b> | <b>&lt;0.001</b> | 96.4±43.9        | 100.5±54.6       | 0.879        | <b>106.4±49.1</b> | <b>122.5±50.8</b> | <b>0.001</b> |
| Sugar drinks (g) -S                  | <b>49.4±89.0</b>  | <b>56.0±99.7</b>  | <b>0.027</b>     | 42.7±84.0        | 46.8±83.8        | 0.908        | 56.1±93.5         | 66.9±115.1        | 0.549        |
| Sodium (mg) -S                       | <b>2412±573</b>   | <b>2519±668</b>   | <b>&lt;0.001</b> | 2338±521         | 2425±630         | 0.210        | 2487±612          | 2628±696          | 0.083        |
| Whole Grains (g)                     | 10.0±15.8         | 9.7±17.3          | 0.223            | 9.9±16.3         | 8.6±15.9         | 0.310        | 10.2±15.3         | 11.0±18.8         | 0.759        |
| Low-fat dairy (g)                    | 97.9±130.8        | 99.0±125.8        | 0.846            | 100.8±129.3      | 89.3±111.2       | 0.794        | 95.0±132.5        | 110.4±140.6       | 0.264        |
| Vegetables (g)                       | 124.4±61.5        | 125.5±56.7        | 0.065            | 131.2±65.2       | 125.9±58.9       | 0.617        | 117.5±56.7        | 125.1±54.2        | 0.241        |
| Seeds, nuts and legumes (g)          | 28.8±29.4         | 27.1±30.6         | 0.326            | <b>30.4±29.2</b> | <b>26.2±31.1</b> | <b>0.014</b> | 27.1±29.5         | 28.2±29.9         | 0.881        |
| Fruits (g)                           | 269.5±157.7       | 271.1±166.9       | 0.243            | 275.8±154.9      | 270.8±160.6      | 0.628        | 263.1±160.5       | 271.4±174.5       | 0.717        |
| <b>aDASH (total score) -SA</b>       | 23.5±3.9          | 23.0±3.9          | 0.059            | <b>24.3±3.7</b>  | <b>23.4±3.9</b>  | <b>0.016</b> | 22.8±4.0          | 22.5±4.0          | 0.632        |
| Red meat (score) -SA                 | <b>3.0±1.4</b>    | <b>2.8±1.4</b>    | <b>0.038</b>     | 3.1±1.4          | 3.1±1.4          | 0.698        | <b>2.9±1.4</b>    | <b>2.5±1.3</b>    | <b>0.005</b> |
| Sugar drinks (score) -S              | 1.8±0.4           | 1.8±0.4           | 0.132            | 1.9±0.4          | 1.8±0.4          | 0.186        | 1.8±0.4           | 1.7±0.4           | 0.342        |
| Sodium (score) -SA                   | <b>2.9±1.5</b>    | <b>2.7±1.5</b>    | <b>0.013</b>     | 3.0±1.4          | 2.8±1.5          | 0.094        | <b>2.8±1.5</b>    | <b>2.6±1.5</b>    | <b>0.047</b> |
| Whole Grains (score)                 | 3.6±0.8           | 3.6±0.8           | 0.512            | 3.6±0.8          | 3.5±0.8          | 0.297        | 3.6±0.8           | 3.6±0.8           | 0.850        |
| Low-fat dairy (score)                | 3.2±1.2           | 3.3±1.2           | 0.490            | 3.2±1.2          | 3.2±1.2          | 0.781        | 3.1±1.2           | 3.3±1.2           | 0.202        |
| Vegetables (score) -S                | 3.0±1.4           | 3.0±1.4           | 0.728            | 3.2±1.4          | 3.1±1.5          | 0.530        | 2.8±1.4           | 2.9±1.4           | 0.265        |
| Seeds, nuts and legumes (score)      | 3.0±1.4           | 2.9±1.5           | 0.104            | <b>3.2±1.3</b>   | <b>2.8±1.4</b>   | <b>0.013</b> | 2.9±1.4           | 2.9±1.5           | 0.934        |
| Fruits (score)                       | 3.0±1.4           | 3.0±1.5           | 0.846            | 3.1±1.4          | 3.1±1.5          | 0.791        | 2.9±1.4           | 3.0±1.4           | 0.645        |
| Red meat (g/1000kcal) -SA            | <b>48.5±22.0</b>  | <b>52.9±24.9</b>  | <b>0.002</b>     | 47.0±21.6        | 49.0±25.3        | 0.649        | <b>50.0±22.3</b>  | <b>57.5±23.8</b>  | <b>0.002</b> |
| Sugar drinks (g/1000kcal)-S          | <b>23.4±43.7</b>  | <b>26.7±47.9</b>  | <b>0.035</b>     | 20.5±41.5        | 22.7±42.5        | 0.907        | 26.2±45.6         | 31.4±53.4         | 0.514        |
| Sodium (mg/1000kcal) -SA             | 1152±220          | 1200±266          | 0.063            | 1137±200         | 1178±248         | 0.141        | 1166±239          | 1225±286          | 0.082        |
| Whole Grains (g/1000kcal)            | 1.2±0.2           | 1.2±0.3           | 0.314            | 1.1±0.2          | 1.2±0.2          | 0.315        | 1.2±0.2           | 1.2±0.3           | 0.743        |
| Low-fat dairy (g/1000kcal)           | 47.7±64.5         | 47.4±60.3         | 0.991            | 49.9±65.4        | 44.0±56.4        | 0.788        | 45.5±63.7         | 51.4±64.5         | 0.280        |
| Vegetables (g/1000kcal) -S           | <b>59.2±27.8</b>  | <b>60.5±28.0</b>  | <b>0.002</b>     | 63.1±28.4        | 61.6±29.3        | 0.498        | 55.2±26.6         | 59.1±26.6         | 0.180        |
| Seeds, nuts and legumes (g/1000kcal) | 13.7±14.0         | 12.9±14.3         | 0.194            | <b>14.6±13.8</b> | <b>12.5±14.4</b> | <b>0.014</b> | 12.9±14.1         | 13.3±14.3         | 0.777        |
| Fruits (g/1000kcal)                  | 128.8±73.6        | 129.6±78.5        | 0.065            | 134.6±75.3       | 132.2±78.6       | 0.678        | 122.9±71.5        | 126.6±78.5        | 0.742        |

HEI-2015. Healthy eating index; DASH. Dietary Approaches to Stop Hypertension; aDASH. Alternate Dietary Approaches to Stop Hypertension MUFAs, monounsaturated fatty acids; PUFAs, polyunsaturated fatty acids; SFAs, saturated fatty acids. Two-way ANOVA analysis: S: differences according to sex; A: differences according to age; R: interaction between sex and IR. # Variable follow a normal distribution. For comparison of means, the Mann-Whitney U test was used if the distribution of the variables was not homogeneous, the Student's t-test for homogeneous distributions.
