# Supplementary material for: Association of Healthy Eating Index-2015 and Dietary Approaches to Stop Hypertension Patterns with Insulin Resistance in Schoolchildren
Source: MDPI journal article supplement (doi:10.3390/nu14204232), 2022-10-11
Supplement: s1 [file s1]

**Table S2.** Anthropometric, physical activity and blood biochemical parameters in the schoolchildren studied according to sex and HOMA-IR

|                                                  | Total                       |                            |                  | Girls                       |                            |                  | Boys                        |                            |                  |
|--------------------------------------------------|-----------------------------|----------------------------|------------------|-----------------------------|----------------------------|------------------|-----------------------------|----------------------------|------------------|
|                                                  | HOMA-<br>IR≤3.16<br>(n=809) | HOMA-<br>IR>3.16<br>(n=45) | p                | HOMA-<br>IR≤3.16<br>(n=410) | HOMA-<br>IR>3.16<br>(n=31) | p                | HOMA-<br>IR≤3.16<br>(n=399) | HOMA-<br>IR>3.16<br>(n=14) | p                |
| Age (years) – I                                  | <b>10.1±0.9</b>             | <b>10.5±1.0</b>            | <b>0.003</b>     | <b>10.1±0.9</b>             | <b>10.5±1.0</b>            | <b>0.039</b>     | <b>10.1±0.9</b>             | <b>10.6±1.0</b>            | <b>0.035</b>     |
| Madrid [% (n)]                                   | 56.1(454)                   | 46.7(21)                   | 0.190            | 61.0(250)                   | 32.3(10)                   | <b>0.002</b>     | 51(204.0)                   | 79(11.0)                   | 0.272            |
| Barcelona [% (n)]                                | 7.5(61)                     | 13.3(6)                    |                  | 6.3(26)                     | 19.4(6)                    |                  | 9(35.0)                     | 0(0.0)                     |                  |
| Sevilla [% (n)]                                  | 12.5(101)                   | 11.1(5)                    |                  | 11.5(47)                    | 12.9(4)                    |                  | 14(54.0)                    | 7(1.0)                     |                  |
| A Coruña [% (n)]                                 | 12.9(104)                   | 22.2(10)                   |                  | 10.2(42)                    | 25.8(8)                    |                  | 16(62.0)                    | 14(2.0)                    |                  |
| Valencia [% (n)]                                 | 11.0(89)                    | 6.7(3)                     |                  | 11.0(45)                    | 9.7(3)                     |                  | 11(44.0)                    | 0(0.0)                     |                  |
| <b>Body composition</b>                          |                             |                            |                  |                             |                            |                  |                             |                            |                  |
| Weight (kg) – I                                  | <b>38.9±9.0</b>             | <b>48.4±10.6</b>           | <b>&lt;0.001</b> | <b>39.0±9.0</b>             | <b>47.0±8.8</b>            | <b>&lt;0.001</b> | <b>38.8±9.0</b>             | <b>51.3±13.8</b>           | <b>&lt;0.001</b> |
| Height (m) # – I                                 | <b>1.4±0.1</b>              | <b>1.5±0.1</b>             | <b>&lt;0.001</b> | <b>1.4±0.1</b>              | <b>1.5±0.1</b>             | <b>&lt;0.001</b> | <b>1.4±0.1</b>              | <b>1.5±0.1</b>             | <b>0.044</b>     |
| BMI (kg/m2) – SIR                                | <b>18.8±3.0</b>             | <b>21.8±3.9</b>            | <b>&lt;0.001</b> | <b>18.7±2.9</b>             | <b>21.0±2.8</b>            | <b>&lt;0.001</b> | <b>18.9±3.1</b>             | <b>23.8±5.1</b>            | <b>&lt;0.001</b> |
| Z-BMI – SI                                       | <b>0.64±1.11</b>            | <b>1.50±1.12#</b>          | <b>&lt;0.001</b> | <b>0.52±1.04</b>            | <b>1.21±0.81</b>           | <b>&lt;0.001</b> | <b>0.76±1.17</b>            | <b>2.13±1.46#</b>          | <b>&lt;0.001</b> |
| <b>Nutritional status by BMI</b>                 |                             |                            |                  |                             |                            |                  |                             |                            |                  |
| Underweight [% (n)]                              | 0.9(7)                      | 0.0(0)                     | <b>&lt;0.001</b> | 0.7(3)                      | 0.0(0)                     | <b>0.002</b>     | 1(4.0)                      | 0(0.0)                     | <b>&lt;0.001</b> |
| Normal weight [% (n)]                            | 61.1(494)                   | 28.9(13)                   |                  | 65.6(269)                   | 32.3(10)                   |                  | 56(225.0)                   | 21(3.0)                    |                  |
| Overweight [% (n)]                               | 26.7(216)                   | 40.0(18)                   |                  | 27.3(112)                   | 51.6(16)                   |                  | 26(104.0)                   | 14(2.0)                    |                  |
| Obesity [% (n)]                                  | 11.4(92)                    | 31.1(14)                   |                  | 6.3(26)                     | 16.1(5)                    |                  | 17(66.0)                    | 64(9.0)                    |                  |
| Body fat (%) # – SI                              | <b>27.4±5.7</b>             | <b>31.6±3.9</b>            | <b>&lt;0.001</b> | <b>29.1±4.7</b>             | <b>31.8±3.4</b>            | <b>&lt;0.001</b> | <b>25.6±6.0</b>             | <b>31.1±4.8</b>            | <b>&lt;0.001</b> |
| <b>Nutritional status by body fat percentage</b> |                             |                            |                  |                             |                            |                  |                             |                            |                  |
| Low fat [% (n)]                                  | 0.4(3)                      | 0.0(0)                     | <b>0.003</b>     | 0.2(1)                      | 0.0(0)                     | <b>0.009</b>     | 1(2.0)                      | 0(0.0)                     | <b>0.047</b>     |
| Normal fat [% (n)]                               | 38.0(307)                   | 11.1(5)                    |                  | 42.4(174)                   | 12.9(4)                    |                  | 34(133.0)                   | 7(1.0)                     |                  |
| Fat excessive [% (n)]                            | 30.9(249)                   | 44.4(20)                   |                  | 31.5(129)                   | 54.8(17)                   |                  | 30(120.0)                   | 21(3.0)                    |                  |
| Obesity [% (n)]                                  | 30.7(248)                   | 44.4(20)                   |                  | 25.9(106)                   | 32.3(10)                   |                  | 36(142.0)                   | 71(10.0)                   |                  |
| <b>Physical activity</b>                         |                             |                            |                  |                             |                            |                  |                             |                            |                  |
| Activity coefficient– S                          | <b>1.53±0.11</b>            | <b>1.49±0.10</b>           | <b>0.008</b>     | <b>1.53±0.11</b>            | <b>1.47±0.07#</b>          | <b>&lt;0.001</b> | 1.53±0.11                   | 1.54±0.13#                 | 0.449            |
| <b>Biochemical data</b>                          |                             |                            |                  |                             |                            |                  |                             |                            |                  |
| Glucose (mg/dL)                                  | <b>84.2±9.6</b>             | <b>89.0±10.4</b>           | <b>0.002</b>     | <b>83.0±10.0</b>            | <b>88.5±8.5</b>            | <b>&lt;0.001</b> | 85.3±9.0                    | 90.1±14.0                  | 0.511            |
| Insulin (mcU/mL) – SI                            | <b>5.6±3.1</b>              | <b>18.9±5.0</b>            | <b>&lt;0.001</b> | <b>6.1±3.2</b>              | <b>19.3±5.6</b>            | <b>&lt;0.001</b> | <b>5.1±2.8</b>              | <b>18.0±3.4</b>            | <b>&lt;0.001</b> |
| QUICKI – I                                       | <b>0.39±0.04</b>            | <b>0.31±0.01</b>           | <b>&lt;0.001</b> | <b>0.38±0.04</b>            | <b>0.31±0.01</b>           | <b>&lt;0.001</b> | <b>0.39±0.04</b>            | <b>0.31±0.01</b>           | <b>&lt;0.001</b> |
| HOMA-IR – I                                      | <b>1.17±0.66</b>            | <b>4.13±1.29</b>           | <b>&lt;0.001</b> | <b>1.27±0.69</b>            | <b>4.23±1.48</b>           | <b>&lt;0.001</b> | <b>1.07±0.61</b>            | <b>3.93±0.68</b>           | <b>&lt;0.001</b> |

BMI, body mass index; IR, insulin resistance .Two-way ANOVA analysis: S: differences according to sex; I: differences according to insulin resistance (IR) score; R: interaction between sex and IR. # Variable follow a normal distribution. For comparison of means, the Mann-Whitney U test was used if the distribution of the variables was not homogeneous, the Student's t-test for homogeneous distributions.
