# Supplementary material for: Association of Healthy Eating Index-2015 and Dietary Approaches to Stop Hypertension Patterns with Insulin Resistance in Schoolchildren
Source: MDPI journal article supplement (doi:10.3390/nu14204232), 2022-10-11
Supplement: s1 [file s1]

Table S5. Parameters of different index in the schoolchildren studied according to HOMA-IR and sex

|                                            | Total            |                  |              | Girls       |              |       | Boys        |             |       |
|--------------------------------------------|------------------|------------------|--------------|-------------|--------------|-------|-------------|-------------|-------|
|                                            | HOMA-IR          | HOMA-IR          | p            | HOMA-IR     | HOMA-IR      | p     | HOMA-IR     | HOMA-IR     | p     |
|                                            | ≤3.16            | >3.16            |              | ≤3.16       | >3.16 (n=31) |       | ≤3.16       | >3.16       |       |
|                                            | (n=809)          | (n=45)           |              | (n=410)     |              |       | (n=399)     | (n=14)      |       |
| <b>HEI-2015</b>                            |                  |                  |              |             |              |       |             |             |       |
| Total Fruits (cups/1000kcal)               | 0.71±0.40        | 0.71±0.43        | 0.976        | 0.74±0.39   | 0.75±0.43    | 0.763 | 0.69±0.40   | 0.64±0.45   | 0.499 |
| Whole Fruits (cups/1000kcal)               | 0.47±0.32        | 0.52±0.37        | 0.473        | 0.48±0.32   | 0.51±0.32    | 0.468 | 0.46±0.32   | 0.52±0.48   | 0.997 |
| Total Vegetables (cups/1000kcal)           | 0.74±0.45        | 0.74±0.54        | 0.353        | 0.81±0.49   | 0.71±0.57    | 0.058 | 0.68±0.40   | 0.79±0.47   | 0.413 |
| Greens and Beans (cups/1000kcal)           | 0.33±0.35        | 0.35±0.43        | 0.530        | 0.36±0.38   | 0.34±0.46    | 0.125 | 0.31±0.31   | 0.39±0.36   | 0.349 |
| Whole Grains (oz/1000kcal)                 | 0.17±0.28        | 0.09±0.13        | 0.262        | 0.16±0.27   | 0.07±0.11    | 0.122 | 0.18±0.28   | 0.12±0.15   | 0.681 |
| Dairy (cups/1000kcal)                      | 0.93±0.32        | 0.96±0.29        | 0.601        | 0.92±0.32   | 0.96±0.27    | 0.368 | 0.95±0.31   | 0.95±0.33 # | 0.460 |
| Total Protein Foods (oz/1000kcal)          | 3.6±1.1          | 3.7±1.1          | 0.635        | 3.6±1.1     | 3.5±1.0      | 0.652 | 3.6±1.0     | 4.0±1.3 #   | 0.069 |
| Seafood and Plant Proteins (cups/1000kcal) | 0.71±0.56        | 0.78±0.62        | 0.555        | 0.74±0.58   | 0.77±0.58    | 0.767 | 0.68±0.54   | 0.81±0.73   | 0.682 |
| (PUFAs+MUFAs)/SFAs                         | 1.6±0.3          | 1.6±0.3          | 0.272        | 1.6±0.3     | 1.6±0.3 #    | 0.103 | 1.6±0.3     | 1.5±0.3     | 0.776 |
| Refined Grains (oz/1000kcal) #             | 2.5±0.7          | 2.6±0.6          | 0.292        | 2.5±0.7     | 2.7±0.6      | 0.113 | 2.6±0.6     | 2.5±0.6     | 0.244 |
| Sodium (mg/1000kcal) - S                   | 1169±238         | 1181±257         | 0.232        | 1155±219    | 1128±233     | 0.109 | 1183±256    | 1300±274    | 0.720 |
| Added Sugars (% of kcal)                   | 8.5±3.6          | 8.3±3.7          | 0.633        | 8.4±3.6     | 8.1±3.4      | 0.864 | 8.7±3.6     | 8.7±4.4     | 0.703 |
| Saturated Fats (% of kcal)                 | 14.4±2.1         | 14.7±2.2 #       | 0.133        | 14.2±2.1    | 14.7±2.2 #   | 0.097 | 14.6±2.1    | 14.8±2.4    | 0.327 |
| <b>DASH</b>                                |                  |                  |              |             |              |       |             |             |       |
| Red meat (g) - S                           | 105.0±49.6       | 100.9±52.3       | 0.418        | 98.2±48.5   | 94.6±45.3    | 0.742 | 111.9±49.8  | 114.9±65.1  | 0.721 |
| Sugar drinks (g) - S                       | 51.5±93.0        | 56.6±96.4        | 0.677        | 44.6±84.3   | 39.9±78.7    | 0.849 | 58.7±100.7  | 93.4±122.5  | 0.188 |
| Sodium (mg) - S                            | 2457±612         | 2351±595         | 0.233        | 2383±571    | 2226±488     | 0.151 | 2533±643    | 2629±728    | 0.638 |
| Whole Grains (g)                           | 10.2±16.7        | 5.0±7.0          | 0.213        | 9.8±16.6    | 4.4±6.9      | 0.111 | 10.6±16.8   | 6.3±7.4     | 0.780 |
| Low-fat dairy (g)                          | 97.0±129.4       | 122.5±119.8      | 0.057        | 94.6±122.2  | 119.9±128.1  | 0.180 | 99.4±136.4  | 128.2±103.2 | 0.172 |
| Vegetables (g)                             | 125.1±59.6       | 118.7±63.5       | 0.416        | 130.3±62.7  | 113.6±64.7   | 0.137 | 119.8±55.8  | 130.0±61.4  | 0.558 |
| Seeds, nuts and legumes (g)                | 28.1±29.9        | 29.3±28.4        | 0.805        | 29.0±30.2   | 25.3±26.4    | 0.342 | 27.2±29.5   | 38.1±31.6   | 0.094 |
| Fruits (g)                                 | 271.6±161.2      | 243.3±156.3      | 0.205        | 275.3±156.7 | 255.0±161.7  | 0.429 | 267.7±165.9 | 217.4±145.8 | 0.217 |
| <b>aDASH</b>                               |                  |                  |              |             |              |       |             |             |       |
| Red meat (g/1000kcal)                      | 50.1±23.0        | 51.0±27.0        | 0.745        | 47.8±23.0   | 47.9±24.2    | 0.913 | 52.5±22.8   | 57.7±32.4   | 0.962 |
| Sugar drinks (g/1000kcal) - S              | 24.5±45.3        | 26.9±45.2        | 0.683        | 21.5±42.2   | 19.3±37.3    | 0.857 | 27.5±48.1   | 43.8±57.1   | 0.197 |
| Sodium (mg/1000kcal) - S                   | 1169±238         | 1181±257         | 0.232        | 1155±219    | 1128±233     | 0.109 | 1183±256    | 1300±274    | 0.720 |
| Whole Grains (g/1000kcal)                  | 4.8±7.7          | 2.4±3.5          | 0.865        | 4.7±7.7     | 2.0±3.1      | 0.406 | 4.9±7.8     | 3.3±4.4     | 0.083 |
| Low-fat dairy (g/1000kcal)                 | <b>46.9±63.3</b> | <b>59.5±56.6</b> | <b>0.044</b> | 46.8±62.3   | 58.2±59.5    | 0.141 | 47.0±64.4   | 62.4±51.3   | 0.164 |
| Vegetables (g/1000kcal)                    | 59.7±27.6        | 59.7±32.6        | 0.729        | 62.9±28.3   | 57.8±34.0    | 0.214 | 56.3±26.5   | 64.1±30.0   | 0.390 |
| Seeds, nuts and legumes (g/1000kcal)       | 13.3±14.1        | 14.7±14.0        | 0.551        | 13.9±14.1   | 12.8±13.2    | 0.485 | 12.8±14.1   | 19.1±15.4   | 0.058 |
| Fruits (g/1000kcal)                        | 129.5±75.4       | 121.2±75.0       | 0.457        | 134.1±76.3  | 128.0±79.2   | 0.756 | 124.8±74.3  | 106.4±64.9  | 0.338 |

HEI-2015. Healthy index; DASH. Dietary Approaches to Stop Hypertension; aDASH. Alternate Dietary Approaches to Stop Hypertension. Two-way ANOVA analysis: S: differences according to sex; I: differences according to IR score; I: interaction between sex and IR. Differences between IR and non-IR within the same sex group (Student's t test or U de Mann-Whitney test depend the distribution of the variable): \*p<0.05; \*\* p<0.01
