# Supplementary material for: Association of Healthy Eating Index-2015 and Dietary Approaches to Stop Hypertension Patterns with Insulin Resistance in Schoolchildren
Source: MDPI journal article supplement (doi:10.3390/nu14204232), 2022-10-11
Supplement: s1 [file s1]

Table S3. Parameters of different index in the schoolchildren studied according to sex

|                                            | Total (n=854) | Girls (n=441)    | Boys (n=413)      | p                |
|--------------------------------------------|---------------|------------------|-------------------|------------------|
| <b>HEI-2015</b>                            |               |                  |                   |                  |
| Total Fruits (cups/1000kcal)               | 0.71±0.40     | <b>0.74±0.40</b> | <b>0.69±0.40</b>  | <b>0.029</b>     |
| Whole Fruits (cups/1000kcal)               | 0.47±0.32     | 0.49±0.32        | 0.46±0.32         | 0.070            |
| Total Vegetables (cups/1000kcal)           | 0.74±0.46     | <b>0.80±0.50</b> | <b>0.69±0.40</b>  | <b>&lt;0.001</b> |
| Greens and Beans (cups/1000kcal)           | 0.34±0.35     | 0.36±0.39        | 0.31±0.31         | 0.075            |
| Whole Grains (oz/1000kcal)                 | 0.17±0.27     | 0.16±0.27        | 0.17±0.28         | 0.308            |
| Dairy (cups/1000kcal)                      | 0.93±0.31     | 0.92±0.32        | 0.95±0.31         | 0.248            |
| Total Protein Foods (oz/1000kcal)          | 3.6±1.1       | 3.6±1.08         | 3.6±1.0           | 0.883            |
| Seafood and Plant Proteins (cups/1000kcal) | 0.71±0.57     | 0.74±0.58        | 0.68±0.55         | 0.176            |
| (PUFAs+MUFAs)/SFAs                         | 1.61±0.30     | <b>1.64±0.32</b> | <b>1.57±0.28</b>  | <b>&lt;0.001</b> |
| Refined Grains (oz/1000kcal) #             | 2.55±0.67     | 2.52±0.69        | 2.58±0.65         | 0.100            |
| Sodium (mg/1000kcal)                       | 1169±239      | 1153±220         | 1187±257          | 0.063            |
| Added Sugars (% of kcal)                   | 8.5±3.6       | 8.3±3.6          | 8.7±3.6           | 0.096            |
| Saturated Fats (% of kcal) #               | 14.4±2.1      | <b>14.2±2.1</b>  | <b>14.6±2.2</b>   | <b>0.009</b>     |
| <b>DASH</b>                                |               |                  |                   |                  |
| Red meat (g)                               | 104.8±49.7    | <b>98.0±48.3</b> | <b>112.0±50.3</b> | <b>&lt;0.001</b> |
| Sugar drinks (g)                           | 51.8±93.1     | <b>44.2±83.9</b> | <b>59.9±101.5</b> | <b>0.027</b>     |
| Sodium (mg)                                | 2451±611      | <b>2372±566</b>  | <b>2536±645</b>   | <b>&lt;0.001</b> |
| Whole Grains (g)                           | 9.9±16.4      | 9.4±16.1         | 10.5±16.6         | 0.223            |
| Low-fat dairy (g)                          | 98.3±129.0    | 96.4±122.7       | 100.4±135.5       | 0.846            |
| Vegetables (g)                             | 124.8±59.8    | 129.2±62.9       | 120.1±55.9        | 0.065            |
| Seeds, nuts and legumes (g)                | 28.2±29.8     | 28.8±30.0        | 27.5±29.6         | 0.326            |
| Fruits (g)                                 | 270.1±161.0   | 273.9±157.0      | 266.0±165.4       | 0.243            |
| <b>aDASH</b>                               |               |                  |                   |                  |
| Red meat (g/1000kcal)                      | 50.1±23.2     | <b>47.8±23.1</b> | <b>52.6±23.1</b>  | <b>0.002</b>     |
| Sugar drinks (g/1000kcal)                  | 24.6±45.3     | <b>21.4±41.9</b> | <b>28.1±48.5</b>  | <b>0.035</b>     |
| Sodium (mg/1000kcal)                       | 1169±239      | 1153±220         | 1187±257          | 0.063            |
| Whole Grains (g/1000kcal)                  | 4.7±7.6       | 4.5±7.5          | 4.9±7.7           | 0.314            |
| Low-fat dairy (g/1000kcal)                 | 47.6±63.0     | 47.6±62.1        | 47.6±64.0         | 0.991            |
| Vegetables (g/1000kcal)                    | 59.7±27.9     | <b>62.6±28.7</b> | <b>56.6±26.7</b>  | <b>0.002</b>     |
| Seeds, nuts and legumes (g/1000kcal)       | 13.4±14.1     | 13.8±14.1        | 13.0±14.2         | 0.194            |
| Fruits (g/1000kcal)                        | 129.1±75.4    | 133.7±76.5       | 124.2±74.0        | 0.065            |

HEI-2015. Healthy eating index; DASH. Dietary Approaches to Stop Hypertension; aDASH. Alternate Dietary Approaches to Stop Hypertension. MUFAs, monounsaturated fatty acids; PUFAs, polyunsaturated fatty acids; SFAs, saturated fatty acids. # Variable follow a normal distribution. For comparison of means, the Mann-Whitney U test was used if the distribution of the variables was not homogeneous, the Student's t-test for homogeneous distributions.
