# Supplementary material for: Association of Healthy Eating Index-2015 and Dietary Approaches to Stop Hypertension Patterns with Insulin Resistance in Schoolchildren
Source: MDPI journal article supplement (doi:10.3390/nu14204232), 2022-10-11
Supplement: s1 [file s1]

**Table S1.** Anthropometric, physical activity and blood biochemical parameters in the schoolchildren studied according to sex and age.

|                                           | Total                  |                        |        | Girls                  |                        |        | Boys                   |                        |        |
|-------------------------------------------|------------------------|------------------------|--------|------------------------|------------------------|--------|------------------------|------------------------|--------|
|                                           | 08-10 years<br>(n=541) | 11-13 years<br>(n=313) | P      | 08-10 years<br>(n=272) | 11-13 years<br>(n=169) | P      | 08-10 years<br>(n=269) | 11-13 years<br>(n=144) | P      |
| Madrid [% (n)]                            | 53.2(288)              | 59.7(187)              | 0.004  | 56.3(153)              | 63.3(107)              | 0.268  | 50.2(135)              | 55.6(80)               | 0.025  |
| Barcelona [% (n)]                         | 6.8(37)                | 9.6(30)                |        | 6.6(18)                | 8.3(14)                |        | 7.1(19)                | 11.1(16)               |        |
| Sevilla [% (n)]                           | 12.6(68)               | 12.1(38)               |        | 12.1(33)               | 10.7(18)               |        | 13.0(35)               | 13.9(20)               |        |
| A Coruña [% (n)]                          | 13.7(74)               | 12.8(40)               |        | 11.8(32)               | 10.7(18)               |        | 15.6(42)               | 15.3(22)               |        |
| Valencia [% (n)]                          | 13.7(74)               | 5.8(18)                |        | 13.2(36)               | 7.1(12)                |        | 14.1(38)               | 4.2(6)                 |        |
| Body composition                          |                        |                        |        |                        |                        |        |                        |                        |        |
| Weight (kg) -A                            | 36.7±8.2               | 44.1±9.4               | <0.001 | 36.4±7.4               | 44.8±9.4               | <0.001 | 37.1±8.8               | 43.2±9.4               | <0.001 |
| Height (m) # -SA                          | 1.4±0.1                | 1.5±0.1                | <0.001 | 1.4±0.1                | 1.5±0.1                | <0.001 | 1.4±0.1                | 1.5±0.1                | <0.001 |
| BMI (kg/m2) -A                            | 18.6±3.1               | 19.7±3.0               | <0.001 | 18.4±2.9               | 19.7±2.9               | <0.001 | 18.8±3.4               | 19.6±3.1               | 0.003  |
| Z-BMI # -S                                | 0.68±1.19              | 0.69±1.02              | 0.498  | 0.54±1.07              | 0.62±0.99              | 0.216  | 0.83±1.28              | 0.76±1.05              | 0.276  |
| Nutritional status by BMI                 |                        |                        |        |                        |                        |        |                        |                        |        |
| Underweight [% (n)]                       | 0.7(4)                 | 1.0(3)                 | 0.386  | 0.7(2)                 | 0.6(1)                 | 0.482  | 0.7(2)                 | 1.4(2)                 | 0.540  |
| Normal weight [% (n)]                     | 58.8(318)              | 60.4(189)              |        | 64.3(175)              | 61.5(104)              |        | 53.2(143)              | 59.0(85)               |        |
| Overweight [% (n)]                        | 26.6(144)              | 28.8(90)               |        | 26.8(73)               | 32.5(55)               |        | 26.4(71)               | 24.3(35)               |        |
| Obesity [% (n)]                           | 13.9(75)               | 9.9(31)                |        | 8.1(22)                | 5.3(9)                 |        | 19.7(53)               | 15.3(22)               |        |
| Body fat (%) # -SA                        | 27.0±6.1               | 28.7±4.7               | <0.001 | 28.7±5.0               | 30.3±3.8               | <0.001 | 25.2±6.5               | 26.9±5.0               | 0.002  |
| Nutritional status by body fat percentage |                        |                        |        |                        |                        |        |                        |                        |        |
| Low fat [% (n)]                           | 0.6(3)                 | 0.0(0)                 | <0.001 | 0.4(1)                 | 0.0(0)                 | 0.046  | 0.7(2)                 | 0.0(0)                 | 0.002  |
| Normal fat [% (n)]                        | 40.4(218)              | 30.0(94)               |        | 43.8(119)              | 34.9(59)               |        | 37.1(99)               | 24.3(35)               |        |
| Fat excessive [% (n)]                     | 26.2(141)              | 40.9(128)              |        | 28.3(77)               | 40.8(69)               |        | 24.0(64)               | 41.0(59)               |        |
| Obesity [% (n)]                           | 32.8(177)              | 29.1(91)               |        | 27.6(75)               | 24.3(41)               |        | 38.2(102)              | 34.7(50)               |        |
| Physical activity                         |                        |                        |        |                        |                        |        |                        |                        |        |
| Activity coefficient -A                   | 1.54±0.11              | 1.51±0.11              | 0.007  | 1.53±0.11              | 1.51±0.10              | 0.089  | 1.54±0.10              | 1.52±0.12              | 0.045  |
| Biochemical data                          |                        |                        |        |                        |                        |        |                        |                        |        |
| Glucose (mg/dL) -S                        | 84.0±10.0              | 85.1±9.0               | 0.112  | 82.7±10.2              | 84.5±9.6               | 0.134  | 85.3±9.7               | 85.9±8.2               | 0.393  |
| Insulin (mcU/mL) -SA                      | 5.8±4.0                | 7.3±4.8                | <0.001 | 6.3±4.3                | 8.3±5.3                | <0.001 | 5.2±3.5                | 6.1±3.9                | 0.005  |
| QUICKI -SA                                | 0.39±0.05              | 0.37±0.04              | <0.001 | 0.39±0.05              | 0.37±0.04              | <0.001 | 0.40±0.04              | 0.38±0.04              | 0.004  |
| HOMA-IR -SA                               | 1.21±0.87              | 1.54±1.09              | <0.001 | 1.31±0.94              | 1.74±1.23              | <0.001 | 1.10±0.77              | 1.30±0.86              | 0.004  |
| IR [% (n)] -SA                            | 3.51(19)               | 8.31(26)               | 0.003  | 4.78(13)               | 10.65(18)              | 0.023  | 2.23(6)                | 5.56(8)                | 0.044  |

BMI, body mass index; IR, insulin resistance. Two-way ANOVA analysis: S: differences according to sex; A: differences according to age; R: interaction between sex and age. # Variable follow a normal distribution. For comparison of means, the Mann-Whitney U test was used if the distribution of the variables was not homogeneous, the Student's t-test for homogeneous distributions.
