# Supplementary material for: Association of Healthy Eating Index-2015 and Dietary Approaches to Stop Hypertension Patterns with Insulin Resistance in Schoolchildren
Source: MDPI journal article supplement (doi:10.3390/nu14204232), 2022-10-11
Supplement: s1 [file s1]

Table S7. Tertiles of the different indices according to sex

|                 | Girls     | Boys      |
|-----------------|-----------|-----------|
| <b>HEI-2015</b> |           |           |
| <b>T1</b>       | 36.3-56.7 | 31.3-54.7 |
| <b>T2</b>       | 56.8-64.4 | 54.8-61.9 |
| <b>T3</b>       | 64.5-85.9 | 61.9-82.2 |
| <b>T2+T3</b>    | 56.8-85.9 | 54.8-82.2 |
| <b>DASH</b>     |           |           |
| <b>T1</b>       | 12-22     | 14-21     |
| <b>T2</b>       | 23-25     | 22-24     |
| <b>T3</b>       | 26-35     | 25-33     |
| <b>T2+T3</b>    | 23-35     | 22-33     |
| <b>aDASH</b>    |           |           |
| <b>T1</b>       | 12-22     | 14-21     |
| <b>T2</b>       | 23-25     | 22-24     |
| <b>T3</b>       | 26-34     | 25-33     |
| <b>T2+T3</b>    | 23-34     | 22-33     |
